# Supplementary material
Source: PubMed Central journal article supplement (PMC4201617)
Supplement: prio-7-488-s01.pdf [file prio-7-488-s01.pdf]

## **Supplemental Material to:**

**Chrysanthi Berberidou, Konstantinos Xanthopoulos,  
Ioannis Paspaltsis, Athanasios Loubopoulos, Eleni  
Polyzoidou, Theodoros Sklaviadis, and Ioannis Poullos**

**Homogenous photocatalytic decontamination of prion  
infected stainless steel and titanium surfaces**

**Prion 2013; 7(5)**

**<http://dx.doi.org/10.4161/pri.27180>**

**<https://www.landesbioscience.com/journals/prion/article/27180/>**

## Supplementary Information

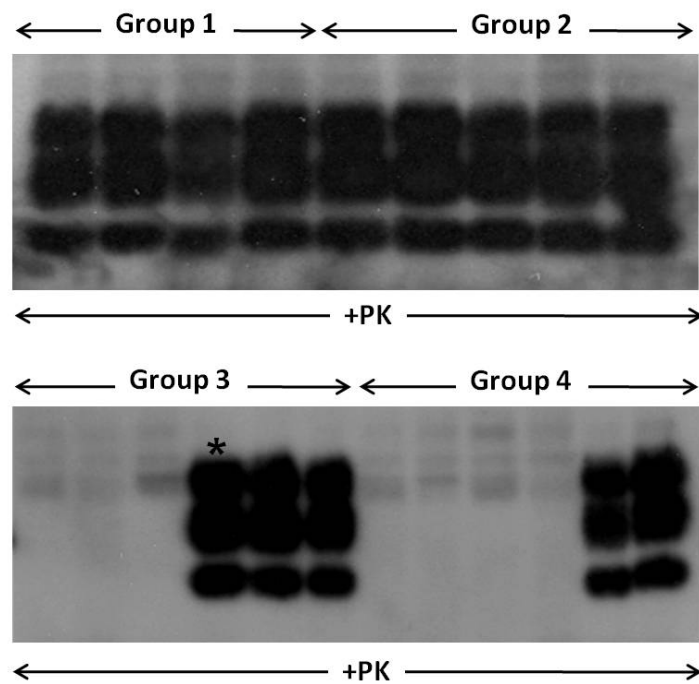

**Figure 1S.** Investigation of the presence or absence of PrP<sup>Sc</sup> in brain tissue of C57BL mice by immunoblotting<sup>13</sup>.

\*An asymptomatic individual of group 3 (photo-Fenton, 180 min) was found with PK-resistant cerebral PrP, 453 days post inoculation.

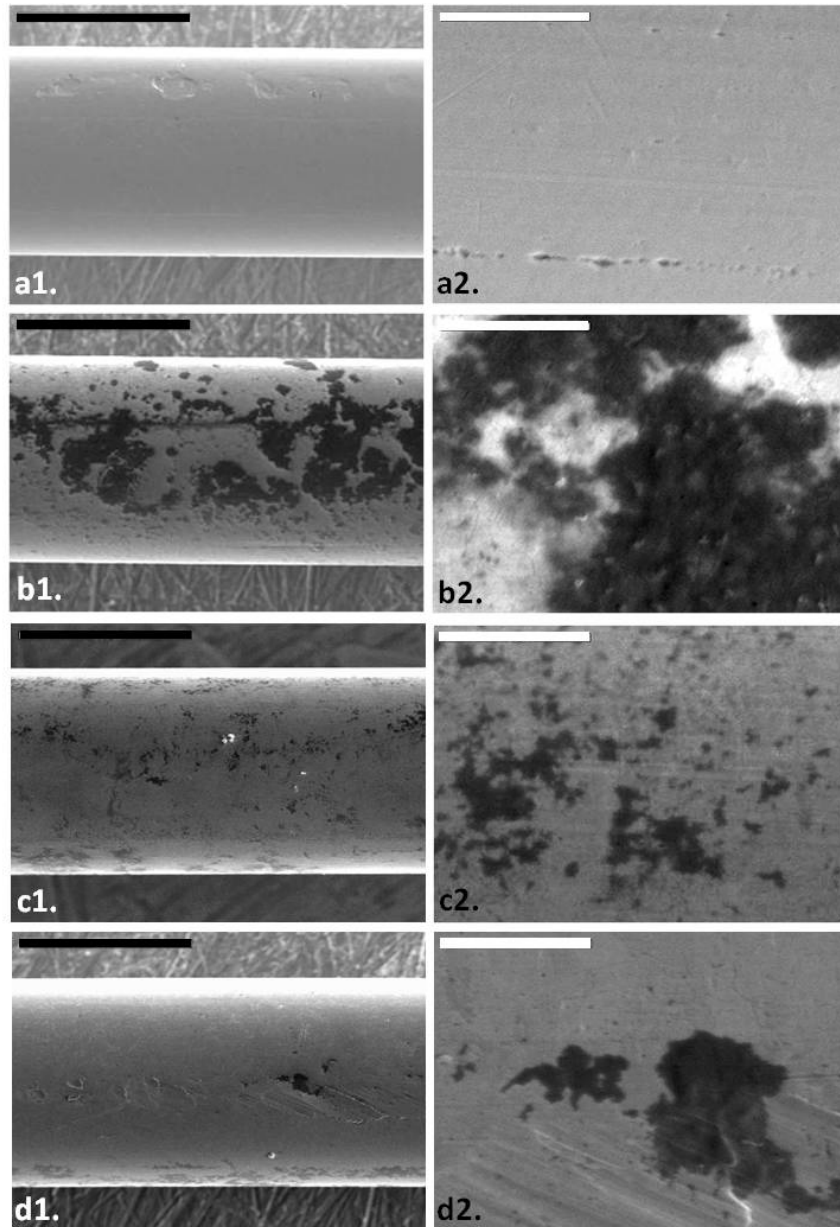

**Figure 2S.** Scanning Electron Microscopy of stainless steel wires. a, uncontaminated, b, incubated with 10% hamster brain homogenate infected with the 263K prion strain, c, incubated with 10% hamster brain homogenate infected with the 263K prion strain and treated with  $56 \mu\text{g mL}^{-1} \text{Fe}^{3+}$ ,  $300 \mu\text{g mL}^{-1} \text{h}^{-1} \text{H}_2\text{O}_2$ ,  $\text{pH}=3.5$ , UV-A for 240 min, d, incubated with 10% hamster brain homogenate infected with the 263K prion strain and treated with  $56 \mu\text{g mL}^{-1} \text{Fe}^{3+}$ ,  $300 \mu\text{g mL}^{-1} \text{h}^{-1} \text{H}_2\text{O}_2$ ,  $\text{pH}=3.5$ , UV-A for 480 min. White bar:  $200 \mu\text{m}$ , black bar:  $20 \mu\text{m}$ . Panels to the right (a2-d2) are close ups of respective areas of the left column (a1-d1).

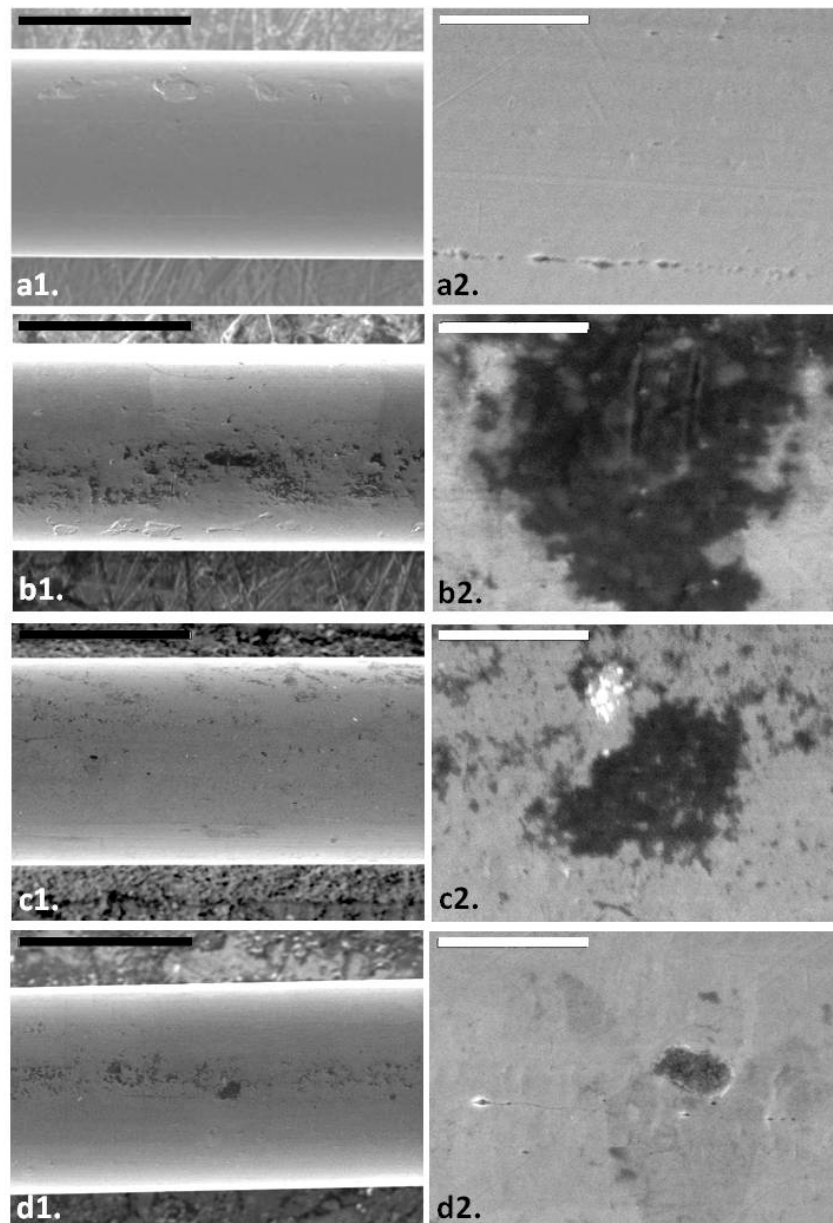

**Figure3S.** Scanning Electron Microscopy of stainless steel wires. a, uncontaminated, b, incubated with 10% hamster brain homogenate infected with the 263K prion strain, c, incubated with 10% hamster brain homogenate infected with the 263K prion strain and treated with  $112 \mu\text{g mL}^{-1} \text{Fe}^{3+}$ ,  $400 \mu\text{g mL}^{-1} \text{h}^{-1} \text{H}_2\text{O}_2$ , pH=3.5, UV-A for 240 min, d, incubated with 10% hamster brain homogenate infected with the 263K prion strain and treated with  $112 \mu\text{g mL}^{-1} \text{Fe}^{3+}$ ,  $400 \mu\text{g mL}^{-1} \text{h}^{-1} \text{H}_2\text{O}_2$ , pH=3.5, UV-A for 480 min. White bar: 200  $\mu\text{m}$ , black bar: 20  $\mu\text{m}$ . Panels to the right (a2-d2) are close ups of respective areas of the left column (a1-d1).

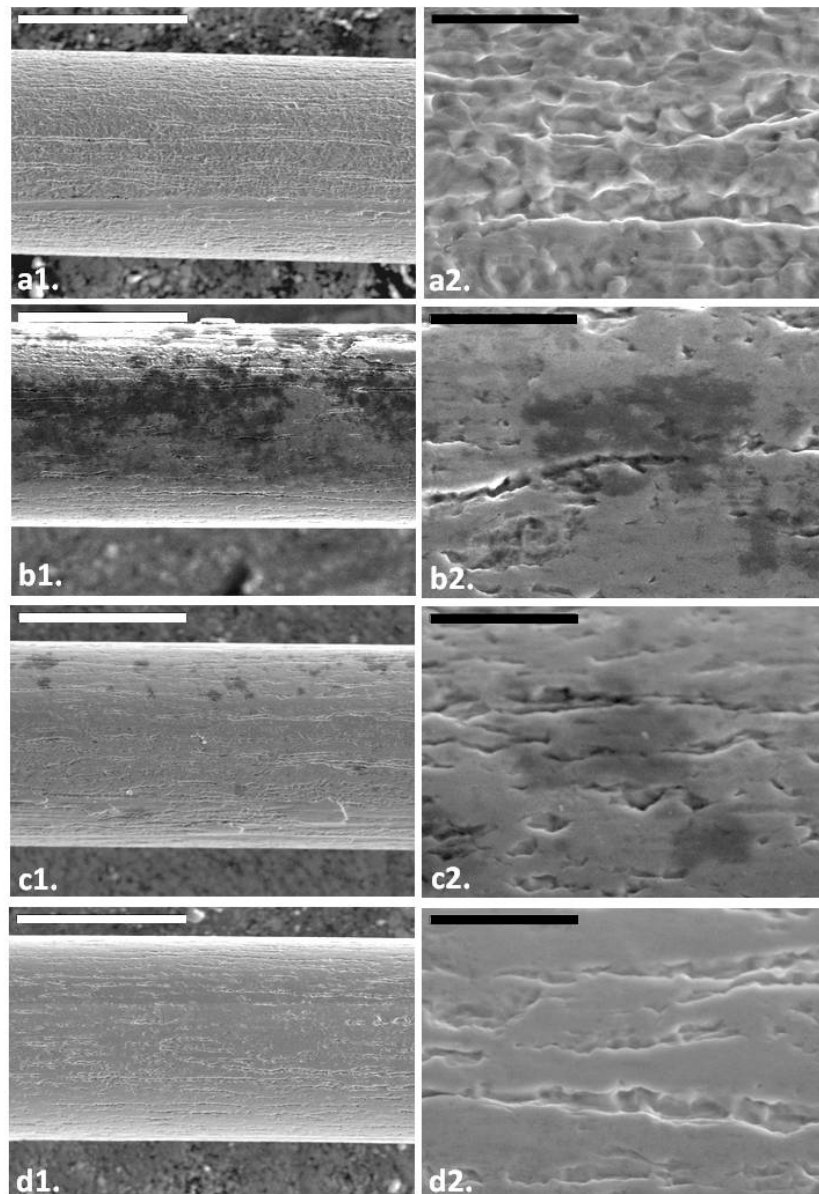

**Figure 4S.** Scanning Electron Microscopy of titanium wires. a, uncontaminated, b, incubated with 10% hamster brain homogenate infected with the 263K prion strain, c, incubated with 10% hamster brain homogenate infected with the 263K prion strain and treated with  $112 \mu\text{g mL}^{-1} \text{Fe}^{3+}$ ,  $400 \mu\text{g mL}^{-1} \text{h}^{-1} \text{H}_2\text{O}_2$ , pH=3.5, UV-A for 240 min, d, incubated with 10% hamster brain homogenate infected with the 263K prion strain and treated with  $112 \mu\text{g mL}^{-1} \text{Fe}^{3+}$ ,  $400 \mu\text{g mL}^{-1} \text{h}^{-1} \text{H}_2\text{O}_2$ , pH=3.5, UV-A for 480 min. White bar:  $200 \mu\text{m}$ , black bar:  $20 \mu\text{m}$ . Panels to the right (a2-d2) are close ups of respective areas of the left column (a1-d1).

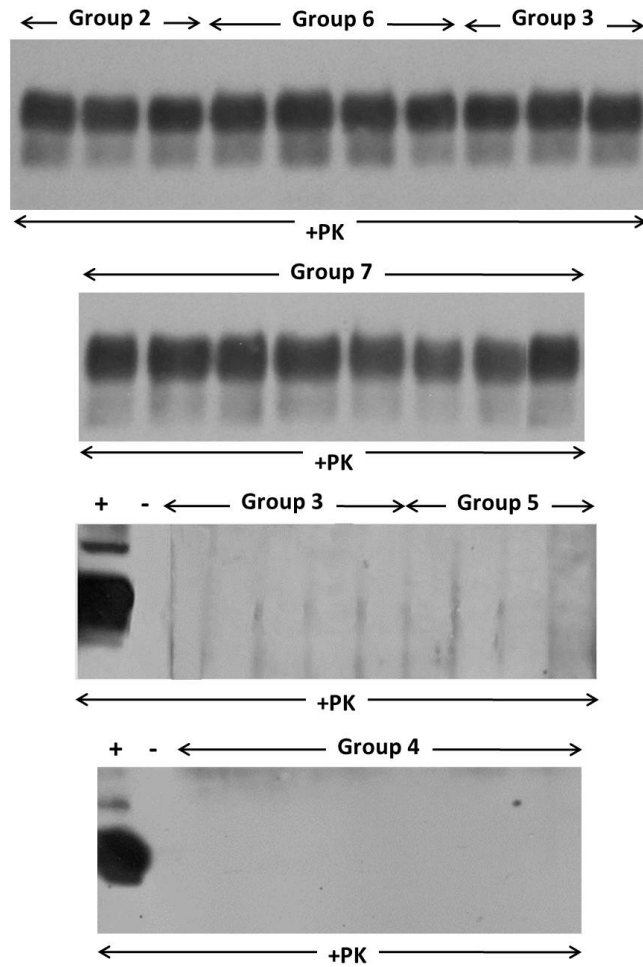

**Figure 5S.** Investigation of the presence or absence of PrP<sup>Sc</sup> in brain tissue of golden Syrian hamsters by immunoblotting<sup>13</sup>. (+): positive control, (-): negative control. The brains of all asymptomatic animals (>505d.p.i.) showed no sign of PrP<sup>Sc</sup> after PK treatment.
